# Supplementary material for: In silico and physico-chemical characterization of cluster formation dynamics in peptide solutions
Source: PubMed Central journal article supplement — Biochem Biophys Rep. 2024 Jun 14;39:101753. doi: 10.1016/j.bbrep.2024.101753 (PMC11637210; doi:10.1016/j.bbrep.2024.101753), 2024-06-14
Supplement: mmc1.pdf [file mmc1.pdf]

# SUPPLEMENTARY MATERIAL:

## Nanocluster Formation Process in Peptide Solutions: Dynamics and Bioactivity Implications

Dimitar Kaynarov<sup>a</sup>, Karina Marinova<sup>a</sup>, Rossitsa Marinova<sup>b,\*</sup>, Peicho Petkov<sup>b</sup>, Lyudmila Velkova<sup>a,\*</sup>, Aleksandar Dolashki<sup>a</sup>, Petar Petrov<sup>a</sup>, Leandar Litov<sup>b</sup>, Elena Lilkova<sup>c</sup>, Nevena Ilieva<sup>c</sup>, Pavlina Dolashka<sup>a</sup>

<sup>a</sup>Institute of Organic Chemistry with Centre of Phytochemistry at the Bulgarian Academy of Sciences, Acad. G. Bonchev Str., Block 9, Sofia, 1113, , Bulgaria

<sup>b</sup>Sofia University "St. Kl. Ohridsky", Physics Faculty, 5, James Bourchier Blvd, Sofia, 1164, , Bulgaria

<sup>c</sup>Institute of Information and Communication Technologies at the Bulgarian Academy of Sciences, Acad. G. Bonchev Str., Block 2, Sofia, 1113, , Bulgaria

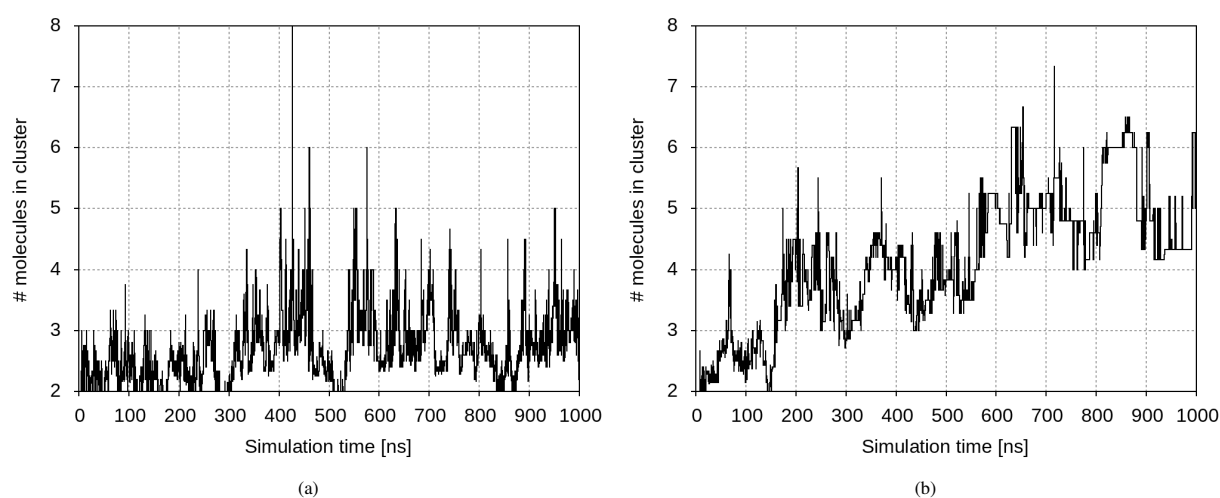

Figure S1: The average cluster size in the (a) p1, resp. (b) p3 mono-component solutions at a concentration of 10 mg/mL.

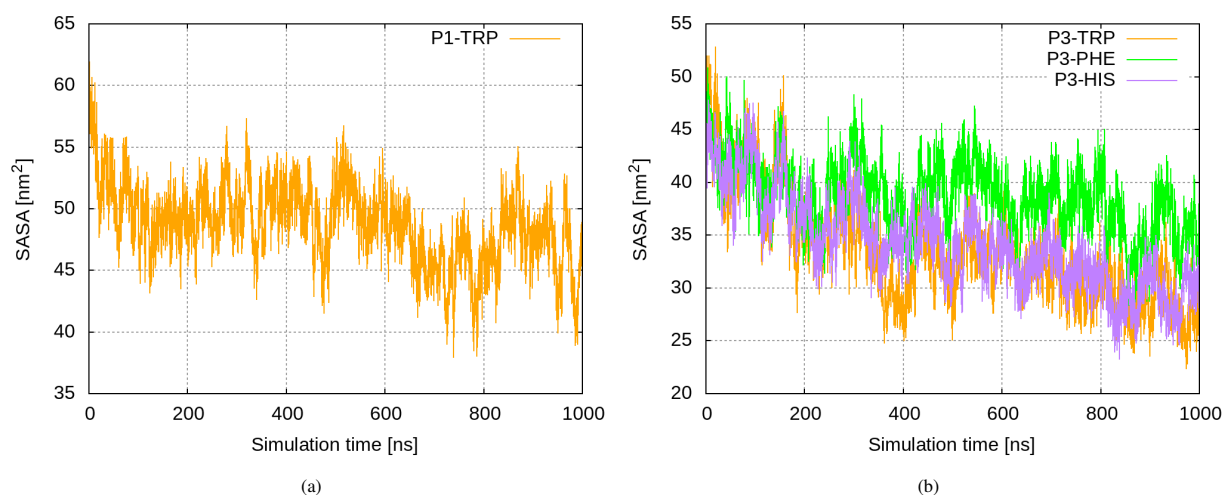

Figure S2: SASA of the aromatic residues in the (a) p1, resp. (b) p3 mono-component solutions at a concentration of 10 mg/mL.

\*Corresponding author

Email addresses: [rosie.marinova@gmail.com](mailto:rosie.marinova@gmail.com) (Rossitsa Marinova), [Lyudmila.Velkova@orgchm.bas.bg](mailto:Lyudmila.Velkova@orgchm.bas.bg) (Lyudmila Velkova)

Preprint submitted to *Biochemistry and Biophysics Reports*

March 12, 2024

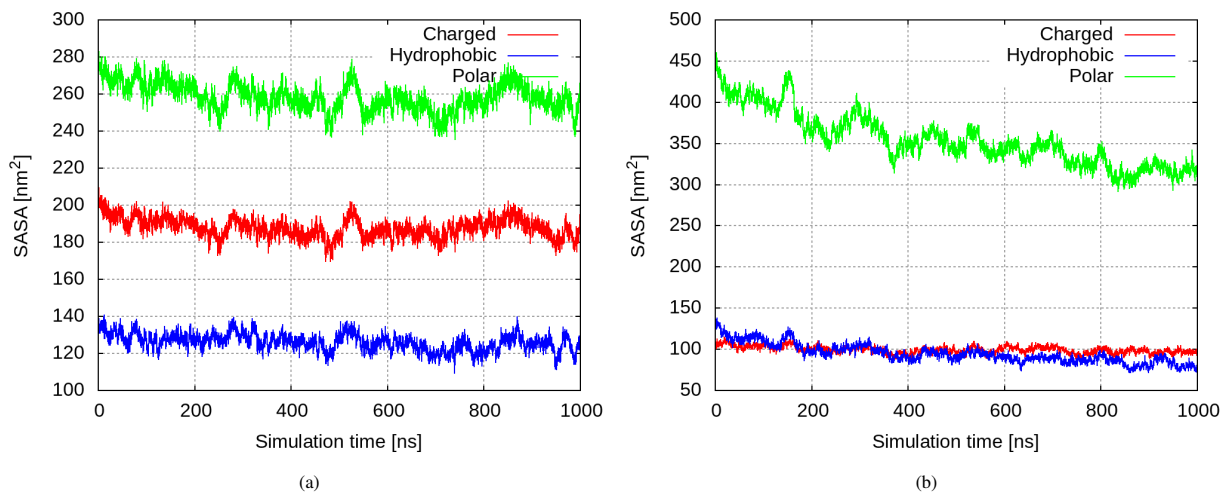

Figure S3: SASA of the hydrophobic (blue), polar (green), and charged (red) residues in the (a) p1, resp. (b) p3 mono-component solutions at a concentration of 10 mg/mL.

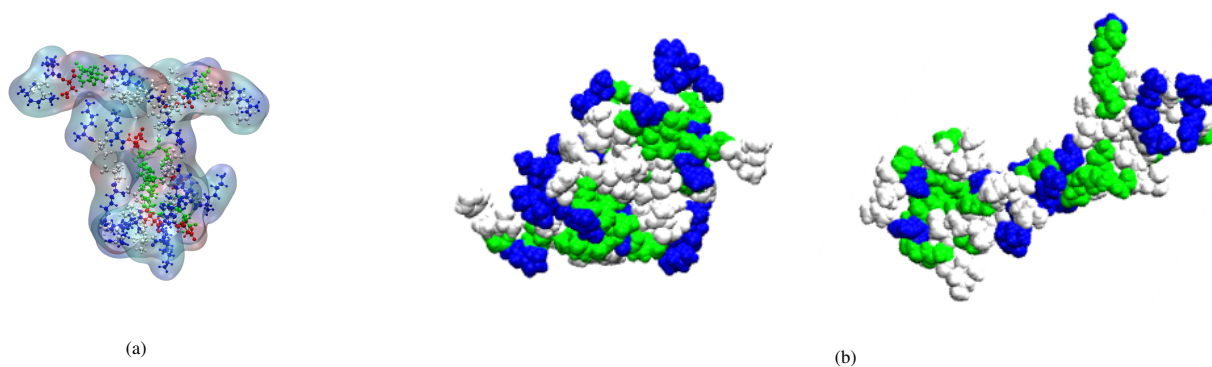

Figure S4: The largest clusters in the (a) p1 and (b) p3 mono-component solutions at a concentration of 10 mg/mL in surface/VdW representation; basic residues are coloured in blue, acidic — in red, polar — in green, and non-polar — in white.

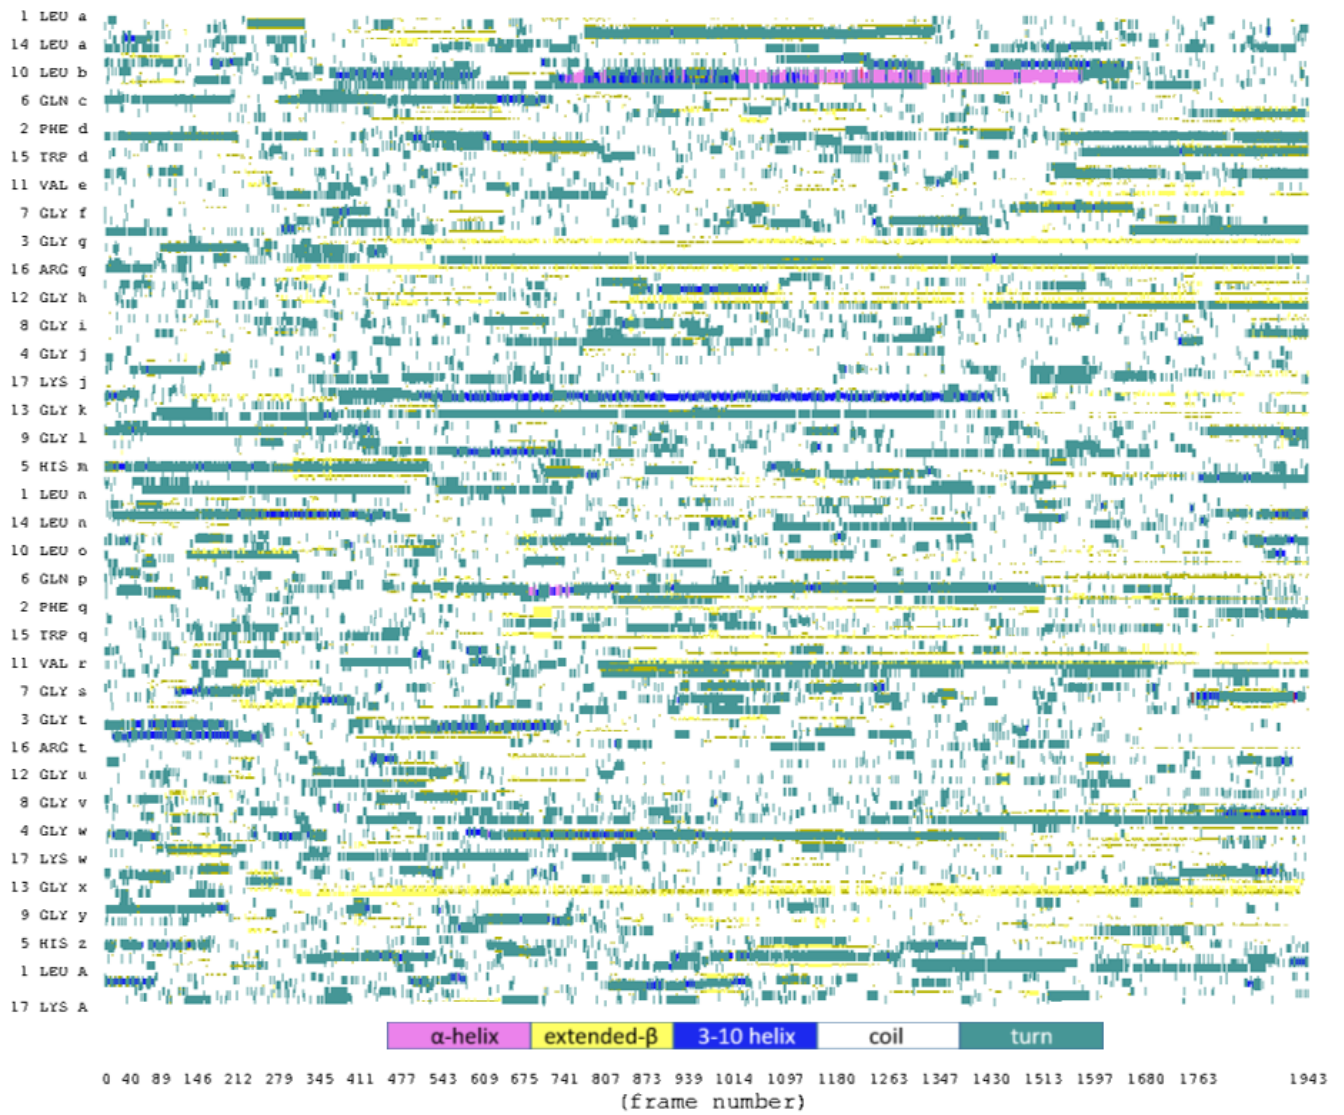

Figure S5: Evolution of the secondary structure of the p3 monocomponent solution.

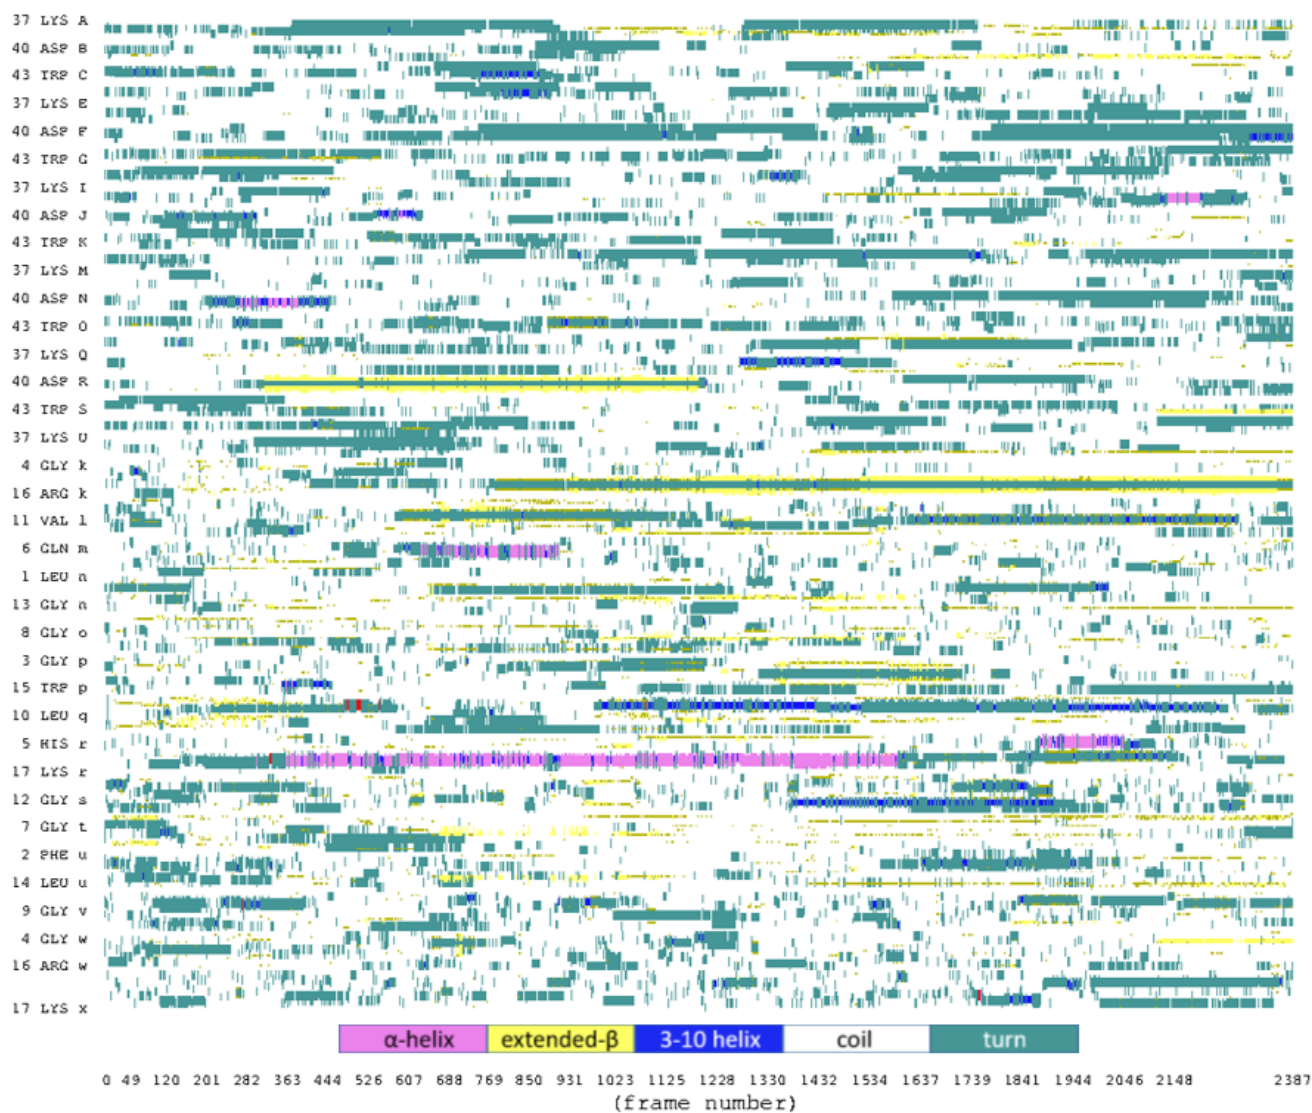

Figure S6: Evolution of the secondary structure of the p1+p3 multicomponent solution.

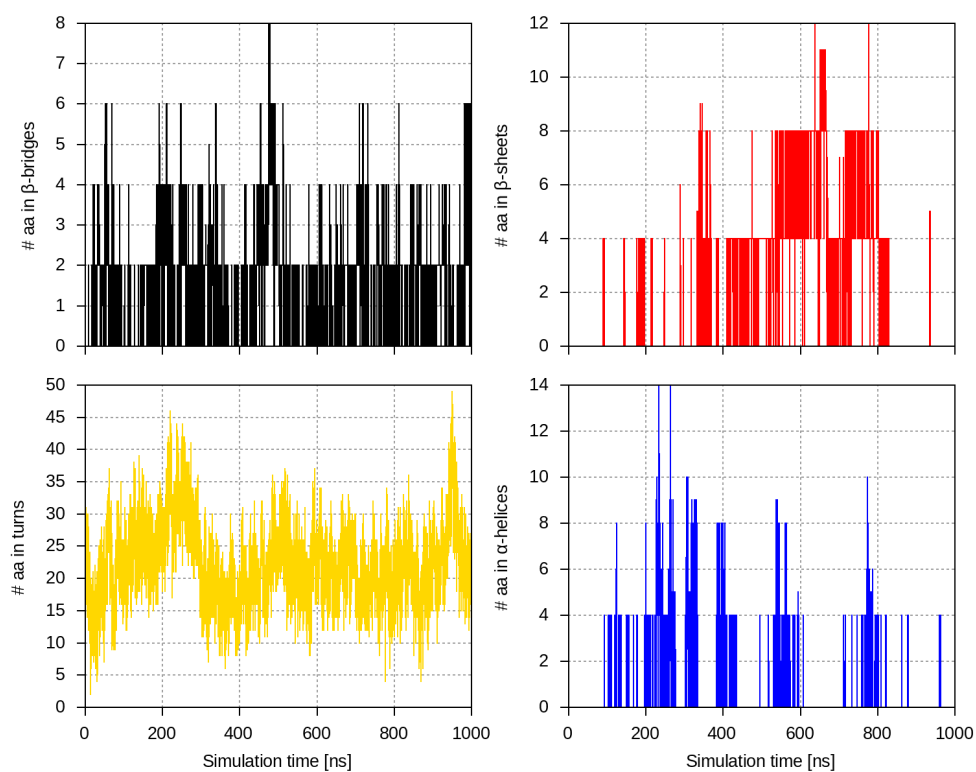

Figure S7: Number of residues involved in the four main secondary-structure elements in the p1 solution.

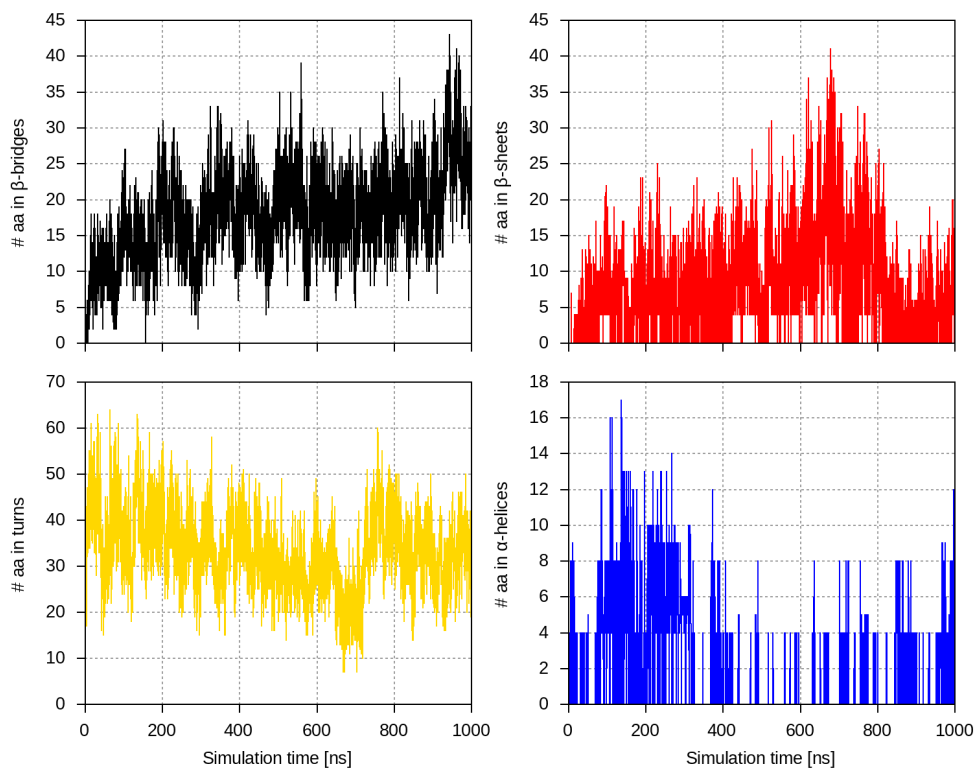

Figure S8: Number of residues involved in the four main secondary-structure elements in the p3 solution.

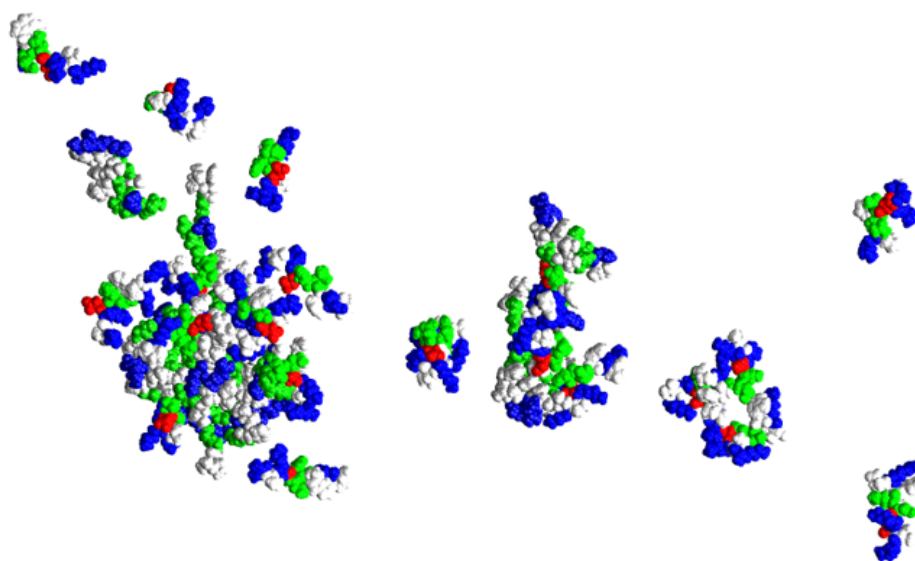

Figure S9: Final conformation (clusters formed) by the end of the multicomponent simulation.

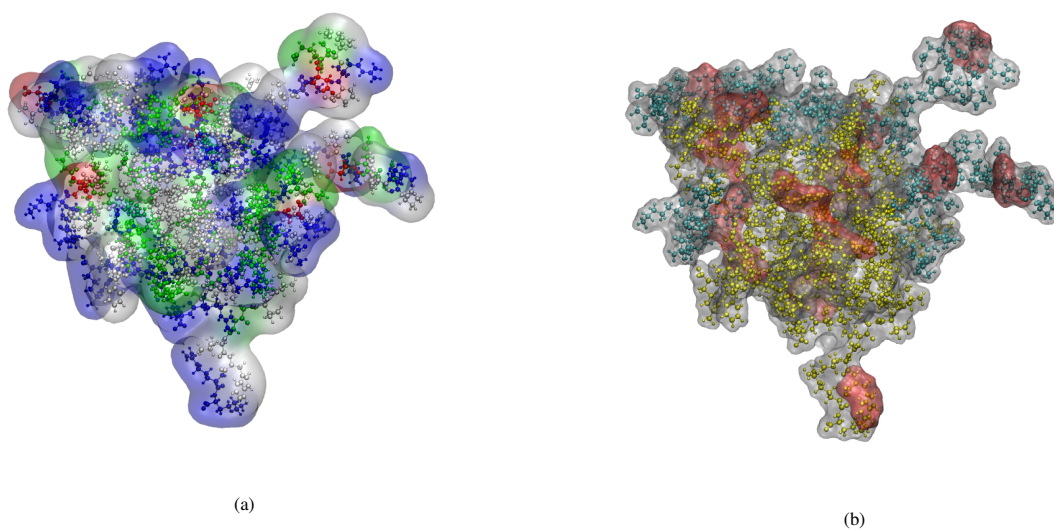

Figure S10: The largest cluster in the multi-component p1+p3 simulation, in surface representation: (a) coloured by residue type, basic residues in blue, acidic – in red, polar – in green, non-polar – in white; (b) coloured by peptide type, p1 in blue, p3 in yellow, Trp residues highlighted in red.

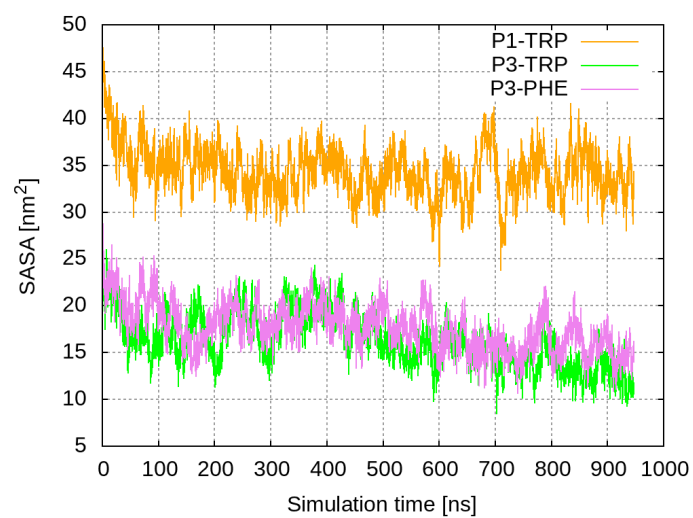

Figure S11: SASA of the Trp and Phe residues in the multicomponent solution.

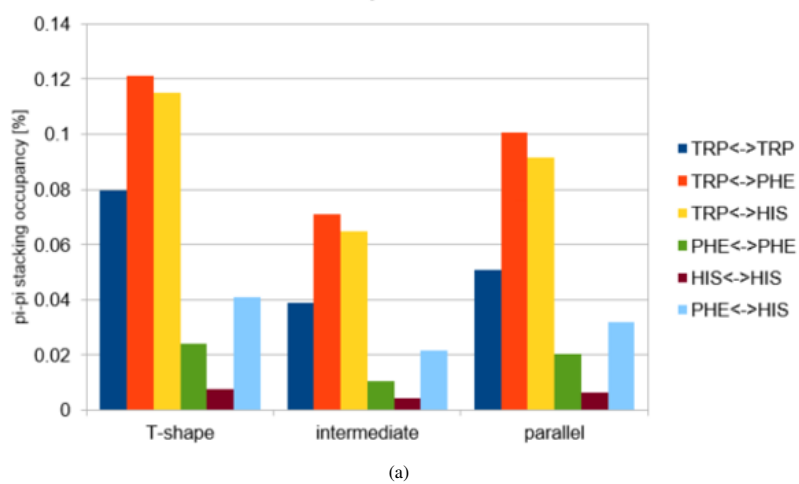

(a)

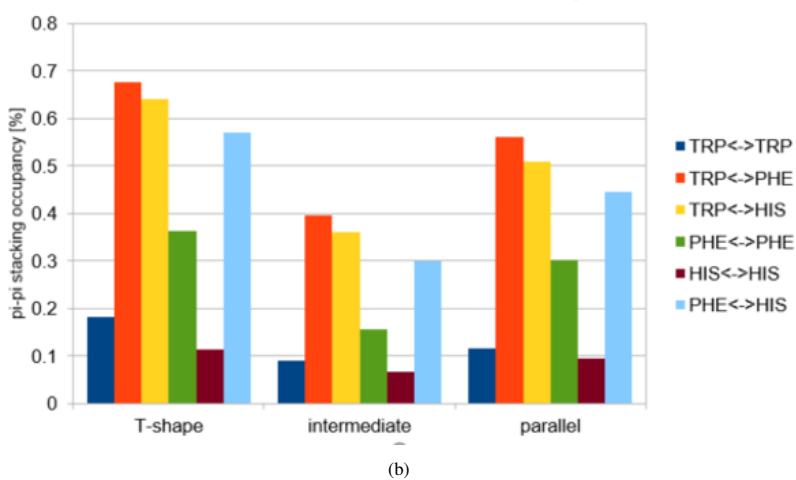

(b)

Figure S12: Percentage of the  $\pi$ - $\pi$  stacking conformations in the peptide mixture simulation: (a) by kind per aromatic pairs; (b) by kind per amino acid type pairs.

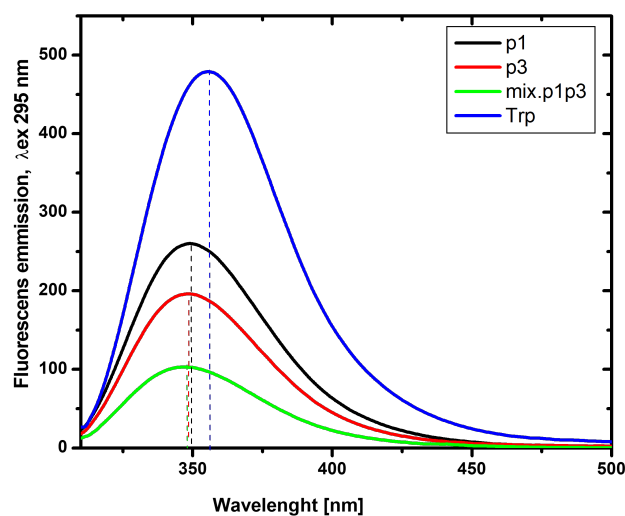

Figure S13: Fluorescence emission spectra of p1, p3, and p1+p3 compared to hydrophobic amino acid tryptophan (concentration of 10 mg/mL) at  $\lambda_{ex} = 295$  nm immediately after the digestion of the peptides in a phosphate buffer (asymmetric quartz cuvette with 4/10 mm optical length at 22°C).

Table S1: Inhibition of *B. subtilis* growth by p1, p3, (p1+p3) combination, and bombinin at different concentrations.

| Concentration [mg/ml] | p1             |           | p3             |           | p1+p3          |           | bombinin       |           |
|-----------------------|----------------|-----------|----------------|-----------|----------------|-----------|----------------|-----------|
|                       | Inhibition [%] | Std. Dev. |
| 11.4                  | 63.3           | 4.2       | 100.0          | 3.5       | 100.0          | 3.2       | 100.0          | 4.2       |
| 5.7                   | 55.0           | 3.0       | 100.0          | 4.6       | 100.0          | 4.1       | 100.0          | 4.3       |
| 2.8                   | 52.8           | 3.9       | 100.0          | 3.5       | 100.0          | 3.3       | 99.0           | 5.5       |
| 1.4                   | 54.7           | 4.8       | 100.0          | 4.8       | 100.0          | 2.5       | 86.8           | 4.7       |
| 0.7                   | 50.1           | 3.8       | 99.5           | 4.7       | 79.0           | 5.2       | 68.1           | 6.1       |
| 0.4                   | 47.2           | 3.4       | 77.4           | 4.4       | 33.8           | 3.4       | 37.1           | 3.0       |
| 0.2                   | 38.6           | 3.3       | 45.6           | 3.2       | 28.5           | 3.3       | 34.4           | 6.3       |
| 0.1                   | 30.8           | 3.8       | 47.4           | 3.8       | 22.9           | 4.1       | 22.6           | 5.5       |

Table S2: Inhibition of *E. coli* 3458 growth by p1, p3, (p1+p3) combination, and bombinin at different concentrations.

| Concentration [mg/ml] | p1             |           | p3             |           | p1+p3          |           | bombinin       |           |
|-----------------------|----------------|-----------|----------------|-----------|----------------|-----------|----------------|-----------|
|                       | Inhibition [%] | Std. Dev. |
| 11.4                  | 100.0          | 4.2       | 100.0          | 3.2       | 96.6           | 3.3       | 100.0          | 3.2       |
| 5.7                   | 49.5           | 6.7       | 100.0          | 3.4       | 100.0          | 4.4       | 100.0          | 4.4       |
| 2.8                   | 53.6           | 3.0       | 100.0          | 3.3       | 100.0          | 3.8       | 100.0          | 4.3       |
| 1.4                   | 33.8           | 3.8       | 100.0          | 4.2       | 100.0          | 3.4       | 85.9           | 4.2       |
| 0.7                   | 34.8           | 3.8       | 99.3           | 3.3       | 54.6           | 5.8       | 42.9           | 3.3       |
| 0.4                   | 42.8           | 4.3       | 57.0           | 5.4       | 35.1           | 5.0       | 18.4           | 6.4       |
| 0.2                   | 28.0           | 4.4       | 55.0           | 3.2       | 39.3           | 4.3       | 60.8           | 3.2       |
| 0.1                   | 30.9           | 5.5       | 45.7           | 4.6       | 54.8           | 5.8       | 47.9           | 3.6       |
